# Supplementary material for: Age-Appropriate Feeding Practices in Cambodia and the Possible Influence on the Growth of the Children: A Longitudinal Study
Source: PubMed Central journal article supplement (PMC7019767; doi:10.3390/nu12010012), 2019-12-19
Supplement: nutrients-12-00012-s001.pdf [file nutrients-12-00012-s001.pdf]

Supplementary material

Supplementary figure S1. Timeline of MyHealth between Baseline and Follow-up 3.

| Province   | Activity                | 2016  |       |     |      |      |        |         |         |          |          | 2017    |          |       |       |  |
|------------|-------------------------|-------|-------|-----|------|------|--------|---------|---------|----------|----------|---------|----------|-------|-------|--|
|            |                         | March | April | May | June | July | August | Septemb | October | November | December | January | February | March | April |  |
| Ratanakiri | Full-questionnaire      |       |       |     |      |      |        |         |         |          |          |         |          |       |       |  |
|            | Anthropometric measures |       |       |     |      |      |        |         |         |          |          |         |          |       |       |  |
| Kratie     | Full-questionnaire      |       |       |     |      |      |        |         |         |          |          |         |          |       |       |  |
|            | Anthropometric measures |       |       |     |      |      |        |         |         |          |          |         |          |       |       |  |
| Phnom Penh | Full-questionnaire      |       |       |     |      |      |        |         |         |          |          |         |          |       |       |  |
|            | Anthropometric measures |       |       |     |      |      |        |         |         |          |          |         |          |       |       |  |

Supplementary table S1. Parameter estimates (Est.), Standard error (SE) and p-values of linear mixed effects models for **Weight-for-Age** by risk factors, including age-appropriate feeding practices

| Variables                     | Model A       |      |        | Model B       |      |        | Model C       |      |        | Ratanakiri  |       |        | Kratie      |       |        | Phnom Penh  |       |        |
|-------------------------------|---------------|------|--------|---------------|------|--------|---------------|------|--------|-------------|-------|--------|-------------|-------|--------|-------------|-------|--------|
|                               | Est           | SE   | P      | Est           | SE   | P      | Est           | SE   | P      | Est         | SE    | P      | Est         | SE    | P      | Est         | SE    | P      |
| Intercept                     | -1.04         | 0.02 | < .001 | -0.79         | 0.05 | < .001 | -0.74         | 0.06 | < .001 | -0.84       | 0.10  | < .001 | -0.69       | 0.10  | < .001 | -0.33       | 0.41  | 0.42   |
| ADF                           | 0.11          | 0.02 | < .001 | 0.004         | 0.01 | 0.8    | 0.004         | 0.02 | 0.83   | 0.05        | 0.03  | 0.12   | 0.01        | 0.03  | 0.88   | 0.02        | 0.04  | 0.19   |
| Sex: Male                     |               |      |        | -0.07         | 0.04 | 0.04   | -0.08         | 0.04 | 0.03   | -0.11       | 0.06  | 0.08   | -0.03       | 0.06  | 0.56   | -0.09       | 0.07  | 0.16   |
| Age                           |               |      |        | -0.03         | 0.01 | < .001 | -0.03         | 0.01 | < .001 | -0.03       | 0.001 | < .001 | -0.03       | 0.003 | < .001 | -0.02       | 0.001 | < .001 |
| Wasting                       |               |      |        | -0.68         | 0.02 | < .001 | -0.69         | 0.02 | < .001 | -0.63       | 0.04  | < .001 | -0.69       | 0.04  | < .001 | -0.76       | 0.06  | < .001 |
| Stunting                      |               |      |        | -0.54         | 0.02 | < .001 | -0.56         | 0.03 | < .001 | -0.53       | 0.04  | < .001 | -0.42       | 0.04  | < .001 | -0.83       | 0.06  | < .001 |
| Mother education: Primary     |               |      |        | 0.18          | 0.05 | < .001 | 0.15          | 0.05 | < .001 | 0.24        | 0.07  | < .001 | 0.13        | 0.08  | 0.11   | -0.07       | 0.11  | 0.50   |
| Mother education: Secondary + |               |      |        | 0.32          | 0.05 | < .001 | 0.28          | 0.05 | < .001 | 0.51        | 0.08  | < .001 | 0.23        | 0.09  | 0.01   | 0.02        | 0.11  | 0.83   |
| Household size                |               |      |        | -0.02         | 0.01 | 0.02   | -0.02         | 0.01 | 0.04   | -0.01       | 0.01  | 0.46   | -0.02       | 0.01  | 0.19   | -0.02       | 0.02  | 0.28   |
| Not having latrine            |               |      |        |               |      |        | -0.11         | 0.03 | < .001 | -0.09       | 0.05  | 0.06   | -0.13       | 0.04  | < .001 | -0.13       | 0.17  | 0.43   |
| Safe drinking water           |               |      |        |               |      |        | 0.03          | 0.03 | 0.26   | 0.001       | 0.04  | 0.94   | 0.05        | 0.03  | 0.16   | 0.11        | 0.39  | 0.78   |
| Province: Kratie              |               |      |        | 0.01          | 0.04 | 0.88   | 0.03          | 0.04 | 0.56   |             |       |        |             |       |        |             |       |        |
| Province: Phnom Penh          |               |      |        | 0.30          | 0.05 | < .001 | 0.26          | 0.05 | < .001 |             |       |        |             |       |        |             |       |        |
| Number obs/participants       | 5,533/2,129   |      |        |               |      |        | 1,906/682     |      |        |             |       |        | 2,190/799   |       |        | 1,437/648   |       |        |
| AIC/BIC values                | 12,254/12,293 |      |        | 11,142/11,241 |      |        | 10,681/10,794 |      |        | 3,476/3,558 |       |        | 4,116/4,202 |       |        | 3,056/3,135 |       |        |

ADF- Age-appropriate feeding practices; Reference groups: Not reaching criteria for ADF, Female, Not wasted, Not Stunted, No mother education, Owning a latrine, Not having safe water for household consumption, Ratanakiri province

**Supplementary table S2.** Parameter estimates (Est.), Standard error (SE) and p-values of linear mixed effects models for **Height-for-Age** by risk factors, including age-appropriate feeding practices

| Variables                            | Model A       |      |        | Model B       |       |        | Model C       |       |        | Ratanakiri  |       |        | Kratie      |       |        | Phnom Penh  |      |        |
|--------------------------------------|---------------|------|--------|---------------|-------|--------|---------------|-------|--------|-------------|-------|--------|-------------|-------|--------|-------------|------|--------|
|                                      | Est           | SE   | P      | Est           | SE    | P      | Est           | SE    | P      | Est         | SE    | P      | Est         | SE    | P      | Est         | SE   | P      |
| <b>Intercept</b>                     | -1.14         | 0.03 | < .001 | -0.76         | 0.07  | < .001 | -0.69         | 0.09  | < .001 | -0.92       | 0.12  | < .001 | -0.45       | 0.14  | < .001 | 0.24        | 0.54 | 0.66   |
| <b>ADF</b>                           | 0.17          | 0.02 | < .001 | 0.01          | 0.02  | 0.91   | 0.01          | 0.02  | 0.90   | 0.01        | 0.04  | 0.79   | 0.04        | 0.03  | 0.19   | 0.05        | 0.05 | 0.07   |
| <b>Sex: Male</b>                     |               |      |        | -0.09         | 0.05  | 0.06   | -0.09         | 0.05  | 0.06   | -0.19       | 0.08  | 0.02   | -0.05       | 0.08  | 0.56   | -0.05       | 0.09 | 0.59   |
| <b>Age</b>                           |               |      |        | -0.06         | 0.002 | < .001 | -0.06         | 0.002 | < .001 | -0.05       | 0.002 | < .001 | -0.07       | 0.002 | < .001 | -0.07       | 0.01 | < .001 |
| <b>Wasting</b>                       |               |      |        | -0.07         | 0.03  | 0.07   | -0.07         | 0.03  | 0.07   | -0.05       | 0.05  | 0.29   | -0.08       | 0.05  | 0.07   | -0.09       | 0.08 | 0.10   |
| <b>Mother education: Primary</b>     |               |      |        | 0.19          | 0.06  | < .001 | 0.15          | 0.07  | 0.02   | 0.20        | 0.10  | 0.04   | 0.17        | 0.11  | 0.13   | 0.07        | 0.15 | 0.18   |
| <b>Mother education: Secondary +</b> |               |      |        | 0.40          | 0.07  | < .001 | 0.34          | 0.07  | < .001 | 0.65        | 0.11  | < .001 | 0.39        | 0.12  | < .001 | 0.08        | 0.15 | 0.38   |
| <b>Household size</b>                |               |      |        | -0.01         | 0.01  | 0.48   | -0.01         | 0.01  | 0.48   | 0.001       | 0.01  | 0.80   | 0.01        | 0.02  | 0.43   | -0.02       | 0.02 | 0.31   |
| <b>Not having latrine</b>            |               |      |        |               |       |        | -0.15         | 0.04  | < .001 | -0.16       | 0.06  | 0.01   | -0.12       | 0.05  | 0.02   | -0.19       | 0.23 | 0.41   |
| <b>Safe drinking water</b>           |               |      |        |               |       |        | 0.04          | 0.03  | 0.24   | 0.08        | 0.05  | 0.13   | 0.01        | 0.04  | 0.79   | 0.06        | 0.52 | 0.91   |
| <b>Province: Kratie</b>              |               |      |        | 0.22          | 0.06  | < .001 | 0.24          | 0.06  | < .001 |             |       |        |             |       |        |             |      |        |
| <b>Province: Phnom Penh</b>          |               |      |        | 0.56          | 0.07  | < .001 | 0.50          | 0.07  | < .001 |             |       |        |             |       |        |             |      |        |
| <b>Number obs/participants</b>       | 5,533/2,129   |      |        |               |       |        |               |       |        | 1,906/682   |       |        | 2,190/799   |       |        | 1,437/648   |      |        |
| <b>AIC/BIC values</b>                | 14,690/14,729 |      |        | 13,900/13,992 |       |        | 13,888/13,994 |       |        | 4,579/4,657 |       |        | 5,242/5,322 |       |        | 4,007/4,081 |      |        |

ADF- Age-appropriate feeding practices; Reference groups: Not reaching criteria for ADF, Female, Not wasted, Not Stunted, No mother education, Owning a latrine, Not having safe water for household consumption, Ratanakiri province

**Supplementary table S3.** Parameter estimates (Est.), Standard error (SE) and p-values of linear mixed effects models for **Weight-for-Height** by risk factors, including age-appropriate feeding practices

| Variables                            | Model A       |      |        | Model B       |       |        | Model C       |       |        | Ratanakiri  |       |        | Kratie      |       |        | Phnom Penh  |       |      |
|--------------------------------------|---------------|------|--------|---------------|-------|--------|---------------|-------|--------|-------------|-------|--------|-------------|-------|--------|-------------|-------|------|
|                                      | Est           | SE   | P      | Est           | SE    | P      | Est           | SE    | P      | Est         | SE    | P      | Est         | SE    | P      | Est         | SE    | P    |
| <b>Intercept</b>                     | -0.78         | 0.02 | < .001 | -0.48         | 0.07  | < .001 | -0.46         | 0.08  | < .001 | -0.38       | 0.11  | < .001 | -0.60       | 0.13  | < .001 | -0.43       | 0.50  | 0.39 |
| <b>ADF</b>                           | 0.15          | 0.02 | < .001 | 0.06          | 0.02  | 0.02   | 0.06          | 0.02  | 0.02   | 0.13        | 0.04  | < .001 | 0.01        | 0.04  | 0.81   | 0.02        | 0.05  | 0.72 |
| <b>Sex: Male</b>                     |               |      |        | -0.09         | 0.04  | 0.04   | -0.09         | 0.04  | 0.04   | -0.02       | 0.07  | 0.82   | -0.04       | 0.07  | 0.56   | -0.19       | 0.08  | 0.01 |
| <b>Age</b>                           |               |      |        | -0.03         | 0.001 | < .001 | -0.03         | 0.001 | < .001 | -0.06       | 0.001 | < .001 | -0.02       | 0.001 | < .001 | 0.001       | 0.001 | 0.30 |
| <b>Wasting</b>                       |               |      |        | -0.07         | 0.03  | 0.07   | -0.07         | 0.03  | 0.07   | -0.07       | 0.03  | 0.07   | -0.06       | 0.04  | 0.09   | -0.07       | 0.07  | 0.32 |
| <b>Mother education: Primary</b>     |               |      |        | 0.16          | 0.05  | < .001 | 0.14          | 0.06  | 0.01   | 0.26        | 0.08  | < .001 | 0.13        | 0.09  | 0.18   | -0.04       | 0.13  | 0.76 |
| <b>Mother education: Secondary +</b> |               |      |        | 0.25          | 0.06  | < .001 | 0.22          | 0.06  | < .001 | 0.38        | 0.09  | < .001 | 0.17        | 0.10  | 0.09   | 0.06        | 0.13  | 0.66 |
| <b>Household size</b>                |               |      |        | -0.02         | 0.01  | 0.08   | -0.02         | 0.01  | 0.08   | 0.01        | 0.02  | 0.58   | -0.05       | 0.02  | < .001 | -0.03       | 0.02  | 0.09 |
| <b>Not having latrine</b>            |               |      |        |               |       |        | -0.10         | 0.04  | 0.01   | -0.09       | 0.06  | 0.10   | -0.11       | 0.05  | 0.04   | -0.13       | 0.20  | 0.24 |
| <b>Safe drinking water</b>           |               |      |        |               |       |        | 0.06          | 0.04  | 0.13   | 0.01        | 0.06  | 0.81   | 0.05        | 0.05  | 0.32   | 0.08        | 0.48  | 0.87 |
| <b>Province: Kratie</b>              |               |      |        | -0.17         | 0.05  | < .001 | -0.15         | 0.05  | < .001 |             |       |        |             |       |        |             |       |      |
| <b>Province: Phnom Penh</b>          |               |      |        | 0.09          | 0.06  | 0.09   | 0.05          | 0.06  | 0.37   |             |       |        |             |       |        |             |       |      |
| <b>Number obs/participants</b>       | 5,533/2,129   |      |        |               |       |        |               |       |        | 1,906/682   |       |        | 2,190/799   |       |        | 1,437/648   |       |      |
| <b>AIC/BIC values</b>                | 14,167/14,207 |      |        | 14,004/14,097 |       |        | 13,900/13,909 |       |        | 4,665/4,737 |       |        | 5,618/5,698 |       |        | 3,635/2,708 |       |      |

ADF- Age-appropriate feeding practices; Reference groups: Not reaching criteria for ADF, Female, Not wasted, Not Stunted, No mother education, Owning a latrine, Not having safe water for household consumption, Ratanakiri province
